# Supplementary material
Source: Springer Nature journal article supplement (https://www.springermedizin.de/resource/supplementary/12889_2014_7023_MOESM4_ESM.pdf/9499716)
Supplement: MOESM4 [file 9499716]

Baseline Interview  
n = 701 pregnant women

n = 62 (43 lost to follow up; 12 still births; 2 neonatal deaths; 5 delivered on the way)

Second interview at 4 weeks  
n = 639 postpartum women; **539 (84.4%) exclusive breastfeeding**

n = 24 (lost to follow up)

Third interview at 12 weeks  
n = 615 postpartum women; **413 (67.2%) exclusive breastfeeding**

n = 100 (15 lost to follow up; 85 could not be followed up due to time constraint on data collection)

Fourth interview at 22 weeks  
n = 515 post-partum women; **153 (29.7%) exclusive breastfeeding**
